# Supplementary material for: The Caenorhabditis elegans p38 MAPK Gene plays a key role in protection from mycobacteria
Source: PubMed Central journal article supplement (PMC4905996; doi:10.1002/mbo3.341), 2016-02-25

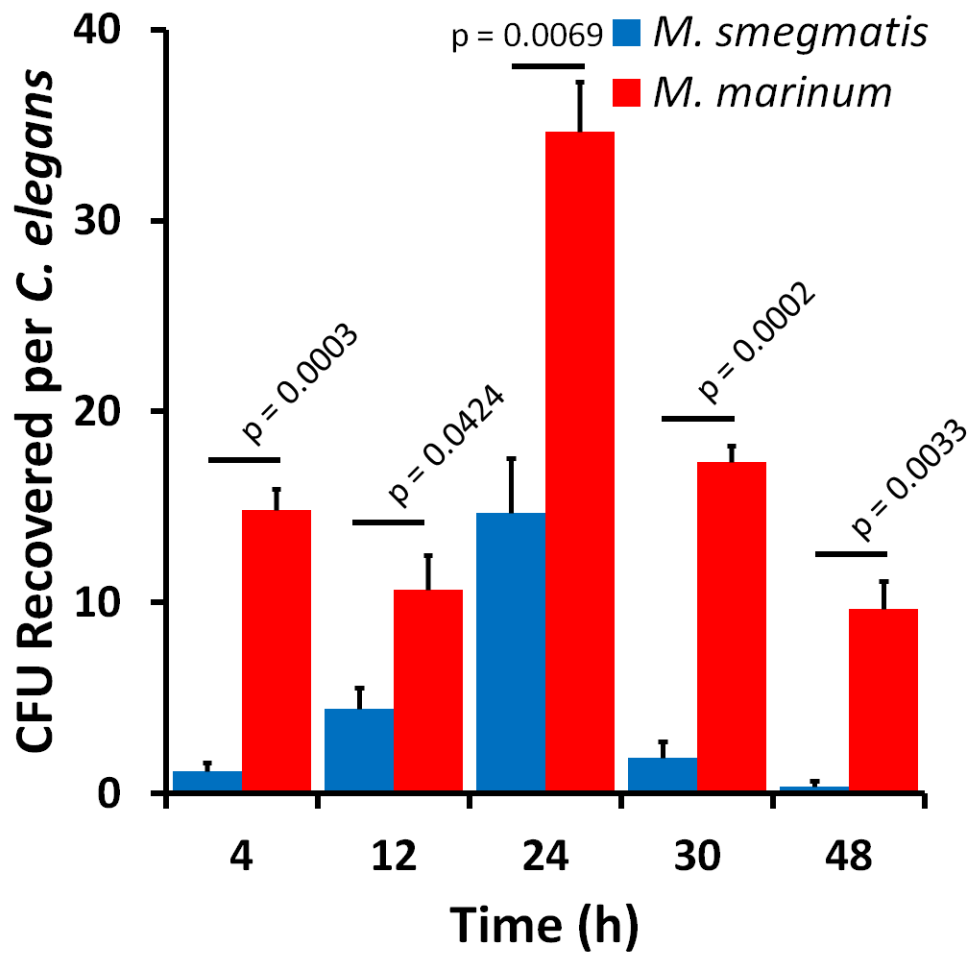

Supplement: MBO3-5-436-s005.pdf [file MBO3-5-436-s005.pdf]
